Title : ADDITIVE EFFECTS OF ORAL CLONIDINE AND FENTANYL ON ISOFLURANE-INDUCED HYPOTENSION : A DOUBLE-BLIND RANDOMIZED STUDY

Authors : B. Bourréli, M.D., J.M. Bernard, M. Pinaud M.D., T. Lechevalier, M.D. and J.V. Bainvel\* M.D.

Affiliation : Département d'Anesthésie, Clinique orthopédique\*, Hôpital Saint-Jacques, Centre Hospitalier Universitaire, 44035 Nantes cedex 01, France

**Introduction.** Clonidine (C) has been shown to reduce fluorinated volatile agent requirements and narcotic doses.<sup>1,2</sup> C is able to facilitate deliberate hypotension during anesthesia.<sup>3,4</sup> In these studies, an important concern is the absence of double-blind experimental protocols. In this context, the possibility of investigational bias and drug interactions cannot be overlooked. The aim of this double-blind randomized study was to assess the respective roles of oral C pretreatment and fentanyl (F) and their combination during isoflurane-induced hypotension on hemodynamic changes and anesthetic requirements.

**Methods.** The protocol was approved by our Human Investigation Committee. Twenty-eight ASA I-II patients (mean age 56.7 years, range 36-79) undergoing total hip replacement gave their consent. They were randomly assigned to 4 groups (n=7) according to C pretreatment (C+) or its placebo (C-), F anesthesia (F+) or its placebo (F-). C+ (3.5 µg.kg<sup>-1</sup>) in groups C+F+ and C+F- and C- in groups C-F+ and C-F- were administered first the evening before surgery, and then with diazepam (0.3 mg.kg<sup>-1</sup>) premedication 2 hours before surgery. No vagolytic medication was given. Anesthesia was induced with thiopental (5 mg.kg<sup>-1</sup>), pancuronium (0.1mg.kg<sup>-1</sup>) and lidocaine (1.5 mg.kg<sup>-1</sup>). A continuous F+ infusion in groups C+F+ and C-F+ or F- in groups C+F- and C-F- was started at a rate of 3 µg.kg<sup>-1</sup>.h<sup>-1</sup>, after a loading dose of 3 µg.kg<sup>-1</sup>. After intubation, patients were ventilated with an O<sub>2</sub>/N<sub>2</sub>O mixture (FiO<sub>2</sub> = 0.5) to which isoflurane (Iso) was then added. Monitoring consisted of a 7.5 Fr Swan Ganz catheter placed under local anesthesia on the evening prior to surgery, ECG, radial artery cannula, and fluorinated volatile infrared analyzer. Hemodynamic measurements were performed at 4 time periods : before pretreatment (T0), in premedicated patients before induction (T1), 20 min after starting Iso end-tidal concentration (ET) = 0.6% (T2) and 20 min after stable hypotension (MAP = 55 mmHg) (T3). Data were compared by ANOVA at each time period of the study; p<0.05 was considered as significant.

**Results.** Demographic and basal vital signs were not different between groups. There were no significant interactions between C and F with respect to hemodynamic data at each time period and Iso ET requirement for maintaining hypotension. Their effects were additive. In C-F+ and C+F- groups, hypotension was easy to obtain, but C alone was unable to reduce the Iso requirement significantly (table). During the study, SI and SVRI were not significantly different between groups. At T1, MAP was lower

(p<0.05) with C+ than with C-. At T2 MAP did not differ between C+ and C- and between F and C, but was significantly lower (p<0.05) with F+ than with F-. CI and MAP are shown in the figures.

**Table:** \*p<0.05, \*\*p<0.02 vs C-F-, <sup>o</sup>p<0.05 vs C+F+

| group   | C-F-  | C-F+  | C+F-             | C+F+   |
|---------|-------|-------|------------------|--------|
| Iso ET% | 2.13  | 1.60* | 1.8 <sup>o</sup> | 1.25** |
| mean±SD | ±0.41 | ±0.65 | ±0.60            | ±0.40  |

**Discussion.** C and F have a central effect decreasing sympathetic outflow and increasing vagal tone.<sup>4,5</sup> During Iso-induced hypotension, HR and CI were not significantly different with C than with the placebo, whereas for the same level of hypotension F led significantly to a lower HR and CI than placebo or C did. These effects are not likely to be competitive but additive when F is associated with C pretreatment. It is suggested that the mechanisms accounting for inhibition of baroreflex sensitivity were different. With sedative, analgesic and moderate hemodynamic effects, C could be a safe alternative to narcotic analgesia. But the hemodynamic additive effects of C and F (bradycardia and fall in CI) could limit the practical use of adding C to the narcotic anesthetic technique.

FIGURES (N=28)

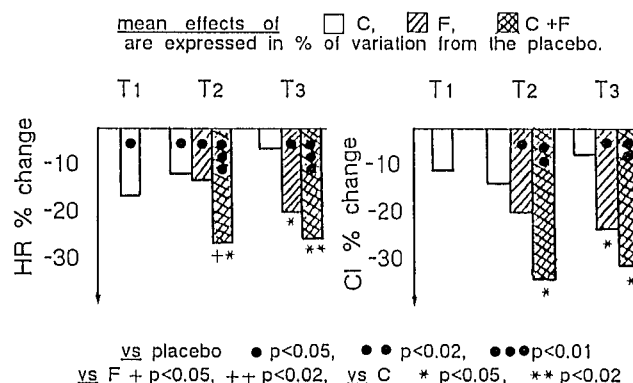

#### References

1. Ghignone M. *Anesthesiology* 67:3A, A38 1987
2. Flacke J W. *Anesthesiology* 67: 11-19, 1987
3. Ghignone M. *Anesthesiology* 67: A38, 1987
4. Woodcock TE. *Br. J. Anaesth* 60: 388-394 1988.
5. Loubie M. In: Hypertension and Brain Mechanisms, *De Jongh ed*, 337-348, Elsevier, 1977
